# Supplementary material
Source: publisher figshare collection journal article supplement (https://acs.figshare.com/ndownloader/files/4706641)
Supplement: Supplementary file 1 [file 4706641]

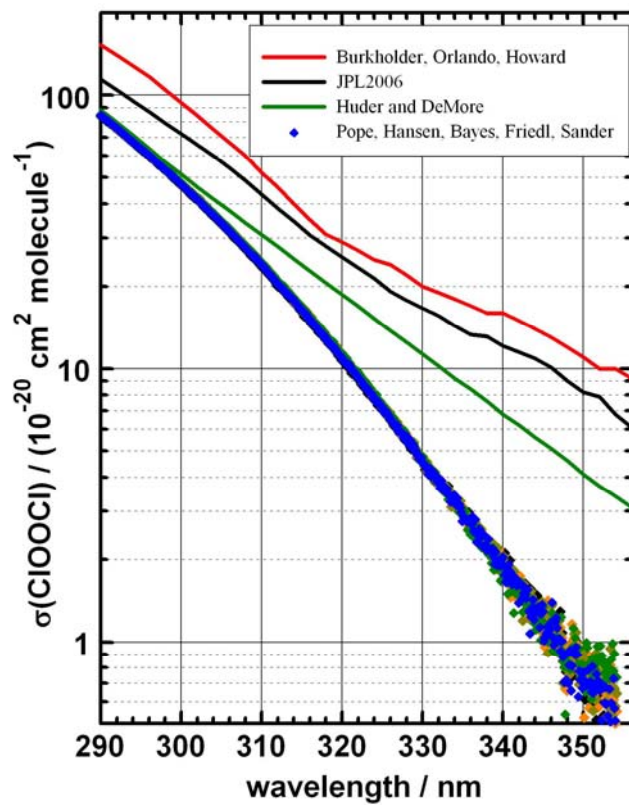

**Figure S1.** A comparison of the ClOOCl cross sections that are most relevant for stratospheric modeling. From top to bottom, they are from references 6, 18, 7, and the present study.
